# Supplementary material for: Fabrics with self-adaptive wettability controlled by “light-and-dark”
Source: Royal Society of Chemistry journal article supplement (doi:10.1039/c1jm12516h), 2011-01-01
Supplement: c1jm12516h.pdf [file c1jm12516h.pdf]

Supporting information to Journal of Materials Chemistry

ATR-FTIR analysis

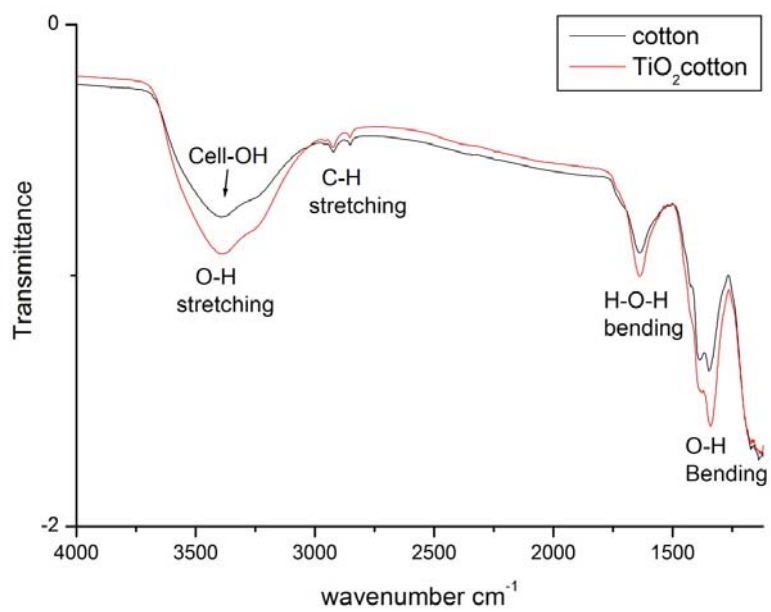

**Fig S1.** ATR-FTIR spectra for pristine cotton fabric and  $\text{TiO}_2$  treated cotton fabric.
